# Supplementary material for: Carbon-Ion Beam Irradiation Kills X-Ray-Resistant p53-Null Cancer Cells by Inducing Mitotic Catastrophe
Source: PubMed Central journal article supplement (PMC4274003; doi:10.1371/journal.pone.0115121), 2014-12-22
Supplement: pone.0115121.s001.pdf [file pone.0115121.s001.pdf]

# Supplementary Figure S1

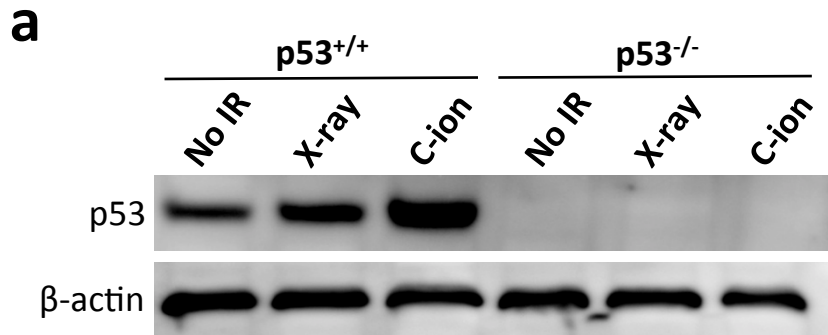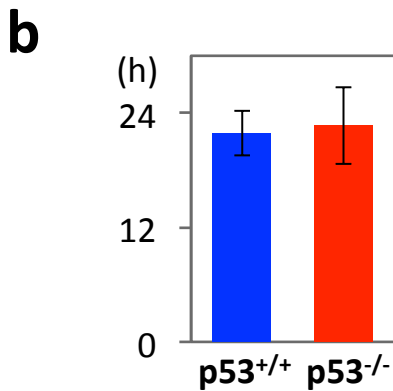

**Supplementary Fig. S1.** Properties of the  $p53^{+/+}$  and  $p53^{-/-}$  cells.

(a) Immunoblots showing X-ray (4 Gy) or carbon-ion beam (C-ion; 1.5 Gy) irradiation-induced expression of p53 in  $p53^{+/+}$  cells, but not in  $p53^{-/-}$  cells at 1 h post-irradiation. IR, irradiation.

(b) The population doubling times of the  $p53^{+/+}$  and  $p53^{-/-}$  cells. Cells were cultured in 100 mm dishes and passaged at a  $5\times$  dilution every 3 days. The number of cells was counted at the time of passage and the population doubling time calculated. Data are expressed as the mean  $\pm$  SD.
