# Supplementary material for: Carbon-Ion Beam Irradiation Kills X-Ray-Resistant p53-Null Cancer Cells by Inducing Mitotic Catastrophe
Source: PubMed Central journal article supplement (PMC4274003; doi:10.1371/journal.pone.0115121), 2014-12-22
Supplement: pone.0115121.s002.pdf [file pone.0115121.s002.pdf]

# Supplementary Figure S2

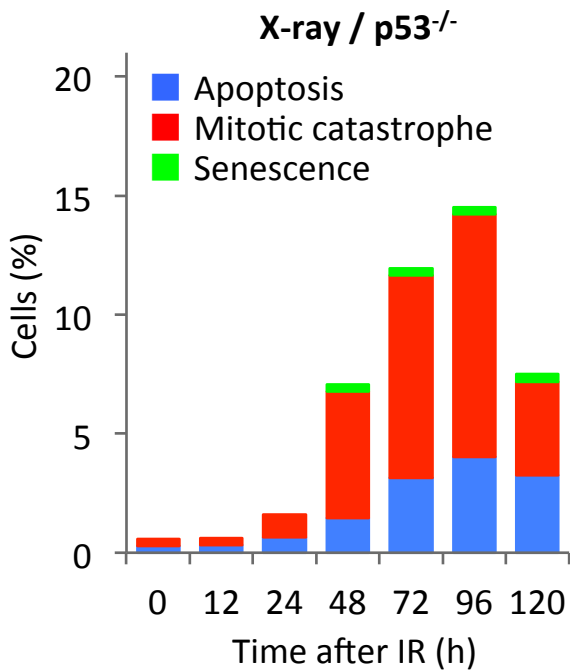

**Supplementary Fig. S2.** The modes of cell death induced by X-ray irradiation for the  $D_{10}$  in HCT116 p53<sup>-/-</sup> cells.

Cells were incubated overnight on coverslips and then irradiated (or not; 0 h) with 6.8 Gy X-rays. Cells were then stained with DAPI at the indicated times. Apoptosis, mitotic catastrophe, and senescence were determined according to the characteristic nuclear morphologies (see “Materials and methods” for the definitions). IR, irradiation.
