# Supplementary material for: Carbon-Ion Beam Irradiation Kills X-Ray-Resistant p53-Null Cancer Cells by Inducing Mitotic Catastrophe
Source: PubMed Central journal article supplement (PMC4274003; doi:10.1371/journal.pone.0115121), 2014-12-22
Supplement: pone.0115121.s003.pdf [file pone.0115121.s003.pdf]

# Supplementary Figure S3

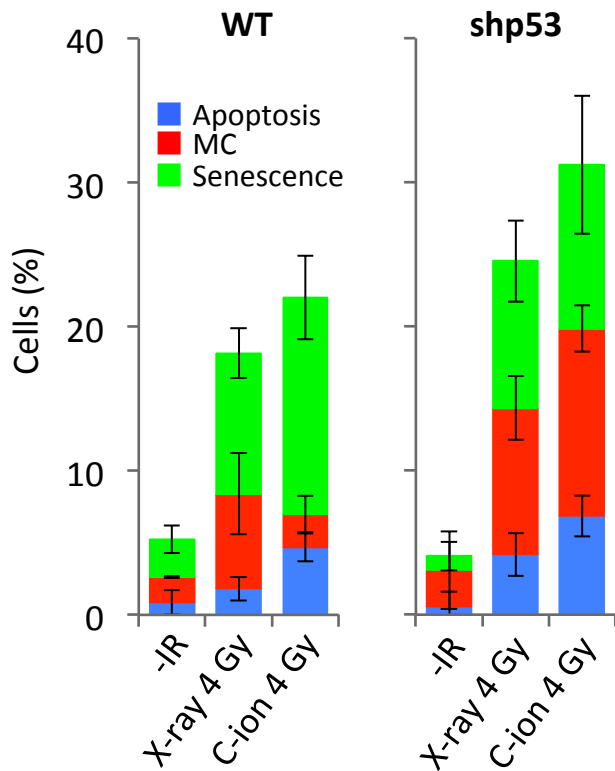

**Supplementary Fig. S3.** The modes of cell death induced by X-ray or carbon-ion beam irradiation in BJ hTERT-WT or -shp53 cells.

Cells seeded on coverslips, incubated for overnight, irradiated (or not) with X-rays (4 Gy) or carbon-ion beams (4 Gy), and then stained with DAPI 96 h later. Apoptosis, mitotic catastrophe, and senescence were determined according to the characteristic nuclear morphologies (see “Materials and methods” for the definitions). Data are expressed as the mean  $\pm$  SD. MC, mitotic catastrophe; C-ion, carbon-ion; IR, irradiation.
