# Supplementary material for: Carbon-Ion Beam Irradiation Kills X-Ray-Resistant p53-Null Cancer Cells by Inducing Mitotic Catastrophe
Source: PubMed Central journal article supplement (PMC4274003; doi:10.1371/journal.pone.0115121), 2014-12-22
Supplement: pone.0115121.s004.pdf [file pone.0115121.s004.pdf]

**Supplementary Table S1**

The number (mean  $\pm$  SD) of  $\gamma$ H2AX foci per cell at the indicated times after irradiation.

|                   |        | 15 min         | 24 h           |
|-------------------|--------|----------------|----------------|
| X-rays (2 Gy)     | p53+/+ | 34.6 $\pm$ 5.2 | 8.2 $\pm$ 0.5  |
|                   | p53-/- | 30.3 $\pm$ 6.8 | 6.8 $\pm$ 0.3  |
| Carbon-ion (1 Gy) | p53+/+ | 21.6 $\pm$ 4.2 | 20.2 $\pm$ 1.6 |
|                   | p53-/- | 22.9 $\pm$ 3.4 | 18.7 $\pm$ 1.4 |
