# Supplementary material for: Carbon-Ion Beam Irradiation Kills X-Ray-Resistant p53-Null Cancer Cells by Inducing Mitotic Catastrophe
Source: PubMed Central journal article supplement (PMC4274003; doi:10.1371/journal.pone.0115121), 2014-12-22
Supplement: pone.0115121.s005.pdf [file pone.0115121.s005.pdf]

**Supplementary Table S2**

LET-dependency of the efficacy of apoptosis induction by carbon-ion beam irradiation in p53-mutant cancer cells.

| Efficient apoptosis induction* | LET (keV/ $\mu$ m) | Dose (Gy)              | Cell line | Endpoint                    | References |
|--------------------------------|--------------------|------------------------|-----------|-----------------------------|------------|
| Yes                            | 184                | 3, 5                   | SQ20B     | sub-G1 fraction             | 12         |
| Yes                            | 100                | 1                      | SAS       | DNA fragmentation etc.      | 15         |
| Yes                            | 100, 70            | 2                      | Ca9-22    | PARP and caspase-3 cleavage | 13         |
| Yes                            | 70                 | ~3 (D30 <sup>†</sup> ) | H1299     | Hoechst 33342 staining      | 14         |
| No                             | 70, 30             | 1                      | SAS       | DNA fragmentation etc.      | 15         |
| No                             | 33.6               | 3, 5                   | SQ20B     | sub-G1 fraction             | 12         |
| No                             | 30, 13             | 2                      | Ca9-22    | PARP and caspase-3 cleavage | 13         |

\*"Yes" indicates that carbon-ion beam irradiation was a better inducer of apoptosis than X-ray irradiation at the iso-survival dose. <sup>†</sup>D30, the dose at which 30% of cells survived.
